# Supplementary material for: Insulitis in human diabetes: a histological evaluation of donor pancreases
Source: Springer Nature journal article supplement (doi:10.1007/s00125-016-4140-z), 2016-10-28
Supplement: MOESM1 [file 10996052]

**ESM Table 1. Information about primary antibodies**

| Primary Antibody | Manufacturer | Clone/article number | Antigen retrieval | Antibody dilution/concentration | Incubation time |
|------------------|--------------|----------------------|-------------------|---------------------------------|-----------------|
| Synaptophysin    | Dako         | DAK-SYNAP            | pH 9              | 1/100                           | 30              |
| CD45             | Dako         | 2B11+PD7/26          | pH 9              | 1/75                            | 30              |
| CD68             | Dako         | KP1                  | pH 9              | 1/100                           | 30              |
| MPO              | Dako         | A0398                | pH 9              | 1/1 200                         | 30              |
| CD3              | Dako         | A0452                | pH 9              | 1/100                           | 30              |
| CD20             | Dako         | L26                  | pH 9              | 1/600                           | 30              |
| INS              | Dako         | A0564                | pH 9              | 1/200                           | 30              |
| GLU              | LSBIO        | LS C312053           | pH 6              | 1/400                           | 30              |
| HLA Class I ABC  | Dako         | EMR8-5               | pH 6              | 1/1 500                         | 60              |
| Caspase 3        | Abcam        | Ab2302               | pH 9              | 10 µg/ml                        | 60              |
